# Supplementary material
Source: PubMed Central journal article supplement (PMC3670941)
Supplement: NIHMS465229-supplement-1_si_001.pdf [file NIHMS465229-supplement-1_si_001.pdf]

# Structures of the Noncanonical RNA Ligase RtcB Reveal the Mechanism of Histidine Guanylylation

Kevin K. Desai, Craig A. Bingman, George N. Phillips, Jr., and Ronald T. Raines\*

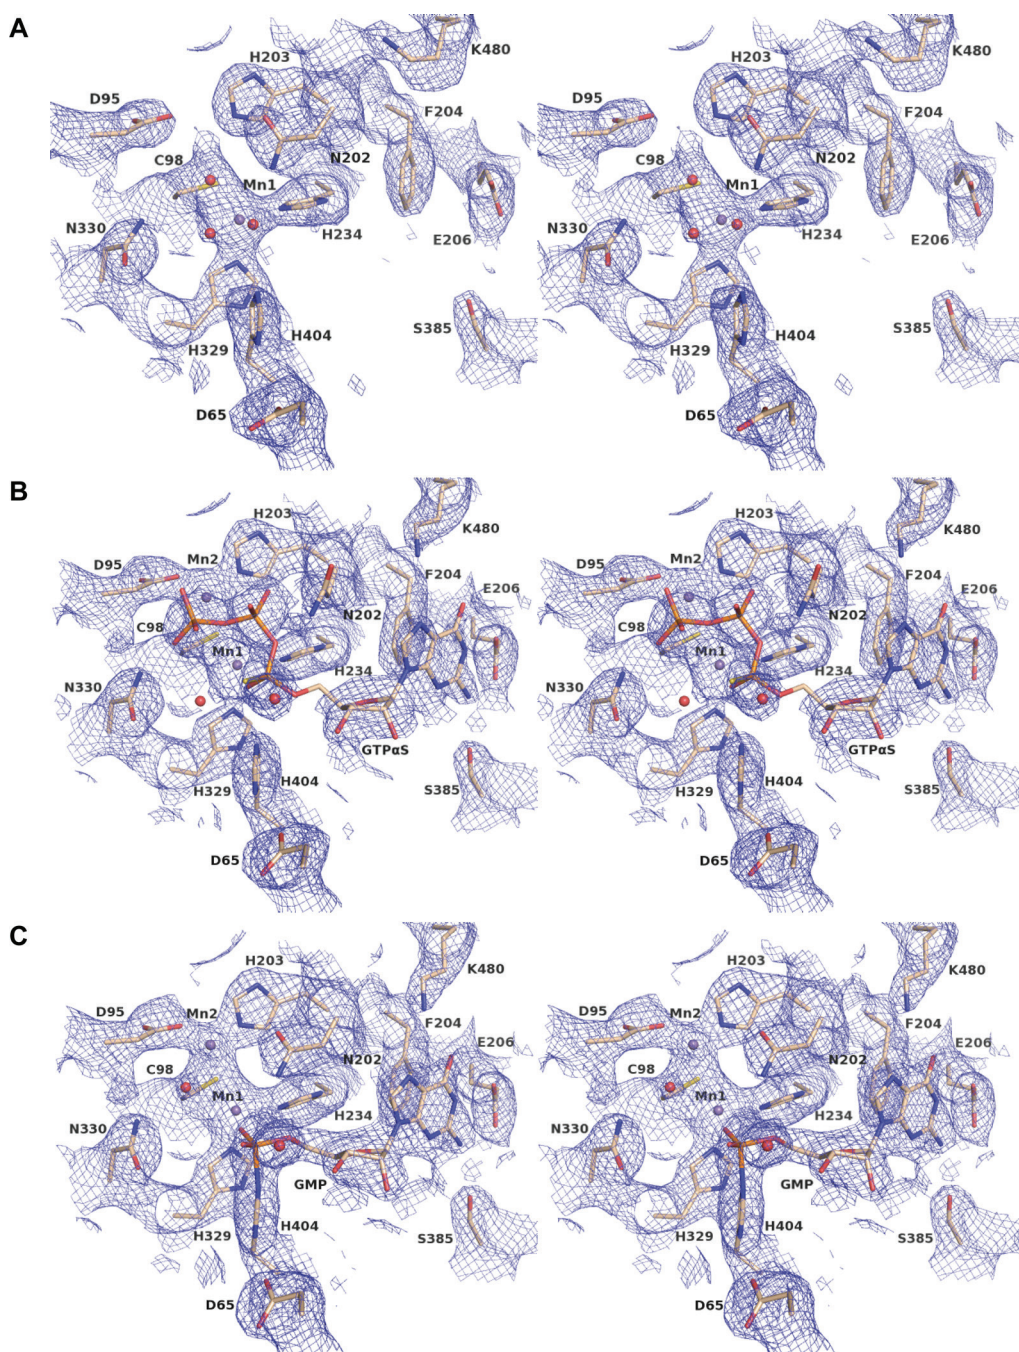

**Figure S1.** Stereo views (wall-eyed) of the active site of RtcB complexes (subunit A). Blue mesh represents  $2F_o - F_c$  density of the refined model contoured at  $1.0 \sigma$ . (A) The RtcB/Mn(II) complex. (C) The RtcB/GTP $\alpha$ S/Mn(II) complex. (D) The RtcB-GMP/Mn(II) covalent intermediate.

**Structure-Guided Mutagenesis of the Guanylate-Binding Pocket.** Eight residues of RtcB were found to interact with GMP. Alanine-scanning mutagenesis of these residues revealed their importance for RNA ligation activity. To assay for RNA ligation, two single-stranded 10-nt RNA fragments were used as substrates in ligation reactions. The 5' RNA fragment had a 3'-P and a 6-carboxyfluorescein (FAM) label at the 5' terminus. The 3' RNA fragment had hydroxyl groups at each terminus. Each of the eight RtcB variants tested were inactive in our ligation assays, consistent with a previous report.<sup>1</sup> The essentiality of these residues is also suggested by their strict evolutionary conservation, with the exception of Phe204, which is substituted with tyrosine in some species.<sup>2</sup> These assays also showed that RtcB can use dGTP as cofactor, although ligation activity is reduced substantially.

**RNA Ligation Assay.** Ligation assays with single-stranded RNA as the substrate used two 10-nt oligonucleotides that were synthesized by Integrated DNA Technologies.<sup>3</sup> The 5' RNA fragment had a 6-carboxyfluorescein (FAM) label on its 5' end and was phosphorylated on its 3' end. The 3' RNA fragment had hydroxyl groups on each end. The sequence of the 5' fragment was FAM-5'-AAAUAACAAA-3'-P and the sequence of the 3' RNA fragment was 5'-AAAUAACAAA-3'. Ligation reactions were performed in 10- $\mu$ L solutions consisting of 50 mM Bis-Tris buffer, pH 7.0, containing NaCl (300 mM), MgCl<sub>2</sub> (0.25 mM), GTP (100  $\mu$ M), each RNA fragment (1  $\mu$ M), and RtcB (10  $\mu$ M). Reaction mixtures were incubated at 70 °C for 1 h prior to the addition of water (40  $\mu$ L) and RNA-loading buffer (50  $\mu$ L). Reaction mixtures were subjected to electrophoresis and visualized as described previously.<sup>3</sup>

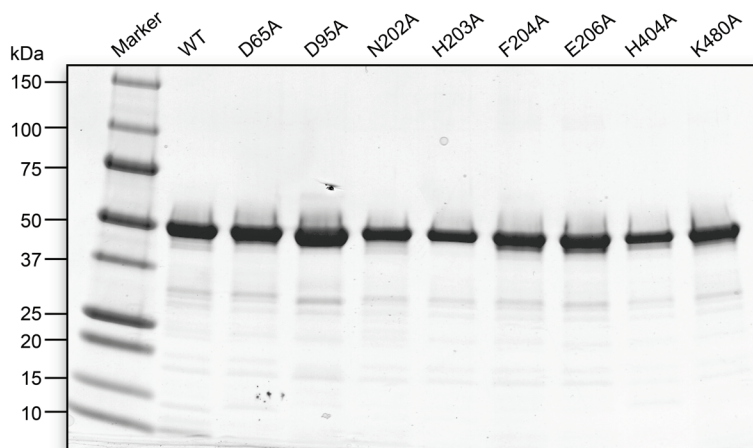

**Figure S2.** Coomassie-stained SDS-polyacrylamide gel showing purity of RtcB variants. Approximately 4  $\mu$ g of recombinant RtcB was loaded in each lane. The identities of the variants are indicated at the top and the molecular weight (kDa) is indicated on the left.

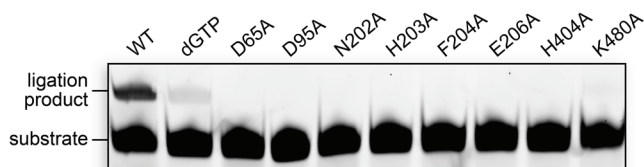

**Figure S3.** RNA ligation assays using variants of RtcB in which GMP-interacting residues have been replaced with alanine. RtcB is also able to use dGTP as a cofactor, though the ligation efficiency is reduced greatly. The ligase substrates are two 10-nt single-stranded RNAs. The 5' RNA fragment is labeled with FAM to allow visualization in a urea-polyacrylamide gel; the 3' RNA fragment has hydroxyl groups at each terminus.

**Table S1. Data Collection and Refinement Statistics<sup>a</sup>**

|                                                       | RtcB/Mn(II)                                             | RtcB/GTP $\alpha$ S/Mn(II)                                                  | RtcB-GMP/Mn(II)                                                  |
|-------------------------------------------------------|---------------------------------------------------------|-----------------------------------------------------------------------------|------------------------------------------------------------------|
| <b>Data collection</b>                                |                                                         |                                                                             |                                                                  |
| Space group                                           | P2 <sub>1</sub> 2 <sub>1</sub> 2 <sub>1</sub>           | P2 <sub>1</sub> 2 <sub>1</sub> 2 <sub>1</sub>                               | P2 <sub>1</sub> 2 <sub>1</sub> 2 <sub>1</sub>                    |
| Cell dimensions<br><i>a</i> , <i>b</i> , <i>c</i> (Å) | 81.04, 137.70, 149.01                                   | 81.11, 138.91, 149.47                                                       | 81.11, 138.91, 149.47                                            |
| Radiation Source                                      | 21-ID-F APS                                             | 21-ID-G APS                                                                 | 21-ID-G APS                                                      |
| Wavelength                                            | 0.97872Å                                                | 0.97857Å                                                                    | 0.97857Å                                                         |
| Resolution (Å)                                        | 49.49–2.34 Å (2.43–2.34)                                | 49.75–2.30 Å (2.39–2.30)                                                    | 49.75–2.4 Å (2.48–2.40)                                          |
| <i>R</i> <sub>sym</sub> or <i>R</i> <sub>merge</sub>  | 0.110(0.832)                                            | 0.148(0.842)                                                                | 0.139(0.990)                                                     |
| Mean <i>I</i> / <i>sI</i>                             | 10.34(2.22)                                             | 9.13(1.40)                                                                  | 11.37(2.15)                                                      |
| Completeness (%)                                      | 99.16(93.41)                                            | 97.44(78.50)                                                                | 99.25(92.40)                                                     |
| Redundancy                                            | 7.1(6.8)                                                | 7.1(4.7)                                                                    | 7.2(6.8)                                                         |
| <b>Refinement</b>                                     |                                                         |                                                                             |                                                                  |
| Resolution (Å)                                        | 49.49–2.34 Å (2.43–2.34)                                | 49.75–2.30 Å (2.39–2.30)                                                    | 49.75–2.4 Å (2.48–2.40)                                          |
| Unique reflections                                    | 70143(6530)                                             | 73441(5841)                                                                 | 66436(6089)                                                      |
| <i>R</i> <sub>work</sub> / <i>R</i> <sub>free</sub>   | 0.156/0.194(0.192/0.249)                                | 0.165/0.205(0.257/0.286)                                                    | 0.152/0.192(0.211/0.267)                                         |
| <i>B</i> -factors (Å <sup>2</sup> )                   |                                                         |                                                                             |                                                                  |
| Protein                                               | 18.2                                                    | 32.3                                                                        | 34.8                                                             |
| Solvent                                               | 24.5                                                    | 37.4                                                                        | 40.6                                                             |
| Ramachandran plot                                     | 96% favored                                             | 96% favored                                                                 | 97% favored                                                      |
| R.M.S. deviations                                     |                                                         |                                                                             |                                                                  |
| Bond lengths (Å)                                      | 0.013                                                   | 0.017                                                                       | 0.015                                                            |
| Bond angles (°)                                       | 1.510                                                   | 1.622                                                                       | 1.482                                                            |
| Protomers                                             | 2                                                       | 2                                                                           | 2                                                                |
| Protein residues                                      | 960                                                     | 960                                                                         | 960                                                              |
| Heteroatoms                                           | 2 Mn(II) ions<br>13 sulfates<br>2 sucrose<br>416 waters | 4 Mn(II) ions<br>2 GTP $\alpha$ S<br>19 sulfates<br>2 sucrose<br>398 waters | 4 Mn(II) ions<br>1 GMP<br>19 sulfates<br>2 sucrose<br>551 waters |
| PDB ID                                                | 4isj                                                    | 4isz                                                                        | 4it0                                                             |

<sup>a</sup> Values in parentheses are for highest-resolution shell.

## References

1. Englert, M. et al. (2012) Structural and mechanistic insights into guanylation of RNA-splicing ligase RtcB joining RNA between 3'-terminal phosphate and 5'-OH, *Proc. Natl. Acad. Sci. U.S.A.* *109*, 15235–15240.
2. Popow, J. et al. (2010) HSPC117 is the essential subunit of a human tRNA splicing ligase complex, *Science* *331*, 760–764.
3. Desai, K.K., and Raines, R.T. (2012) tRNA ligase catalyzes the GTP-dependent ligation of RNA with 3'-phosphate and 5'-hydroxyl termini, *Biochemistry* *51*, 1333–1335.
